# Supplementary material for: Extracellular Matrix Hydrogels Originated from Different Organs Mediate Tissue-Specific Properties and Function
Source: MDPI journal article supplement (doi:10.3390/ijms222111624), 2021-10-27
Supplement: s1 [file s1]

## Extracellular Matrix Hydrogels Originated from Different Organs mediate Tissue-Specific Properties and Function

Tzila Davidov, Yael Efraim, Rotem Hayam, Jacopo Oieni, Limor Baruch, and Marcelle Machluf\*

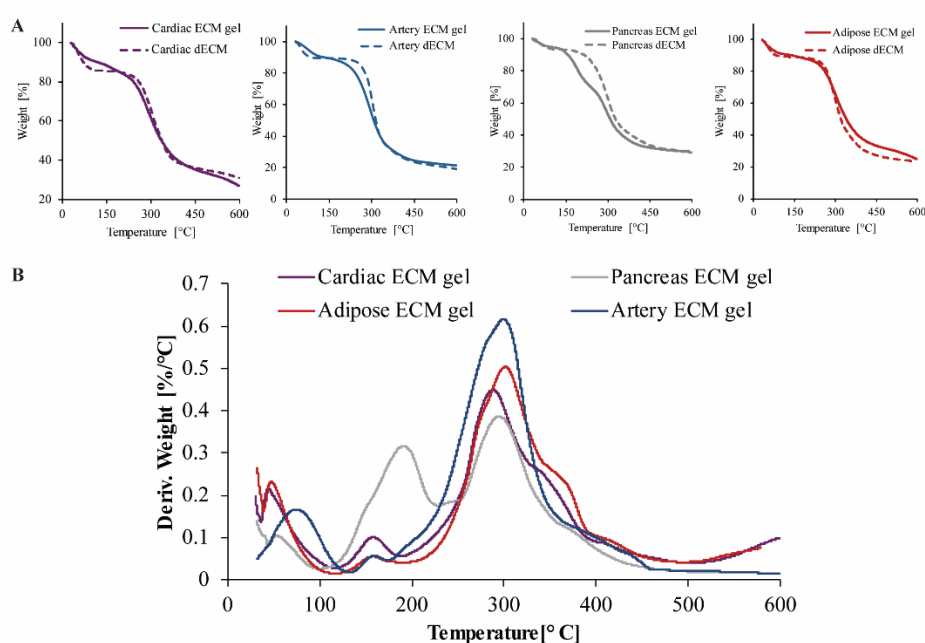

**Figure S1. Thermal gravimetric analysis of pECM hydrogels and decellularized pECM.**

Samples weight (A) and their 1<sup>st</sup> derivative (B) upon increasing the temperature of cardiac, artery, pancreas, and adipose pECM.

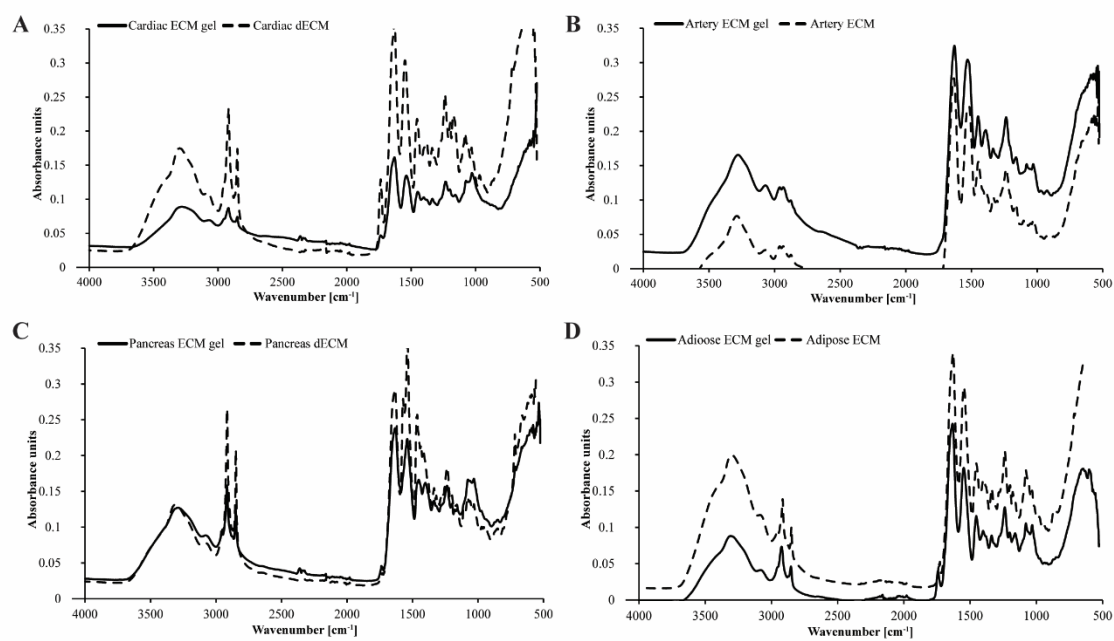

**Figure S2. Preservation of the molecular structure of pECM hydrogels.** FTIR analysis of pECM hydrogels and decellularized pECM of (A) cardiac, (B) artery, (C) pancreas, and (D) adipose pECM.

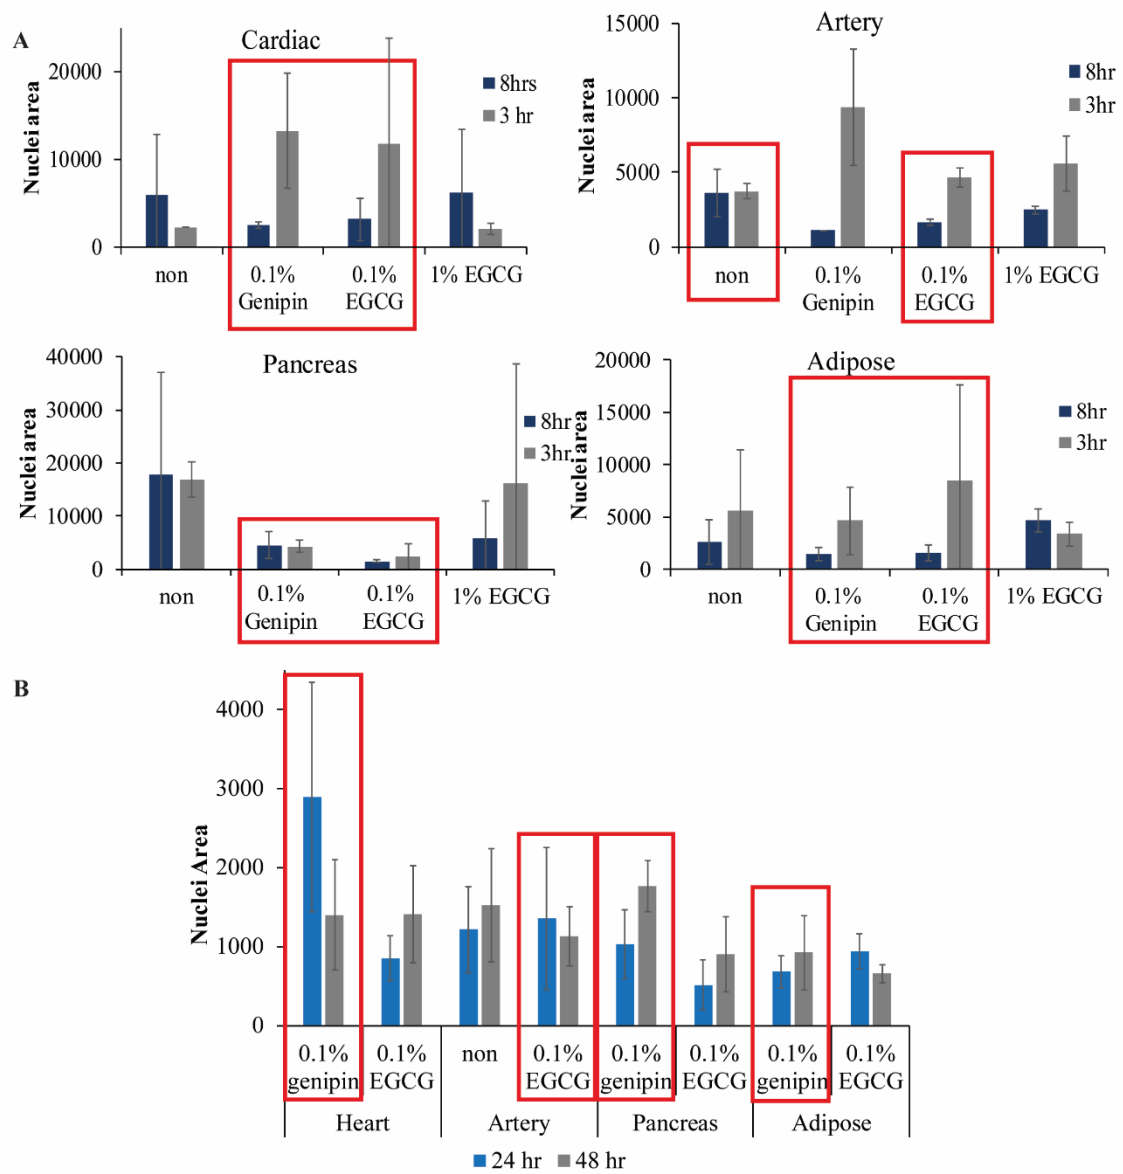

**Figure S3. hiPSCs adherence to crosslinked pECM hydrogels.** InCell 2000 quantitative analysis determining the hiPSCs adherence to pECM hydrogels supplemented with natural crosslinkers. Cell adherence is represented by the nuclei area. (A) Cell adherence 3 and 8 hours post-seeding using variable crosslinkers, and (B) 24 and 48 hours post-seeding using the chosen crosslinking conditions.

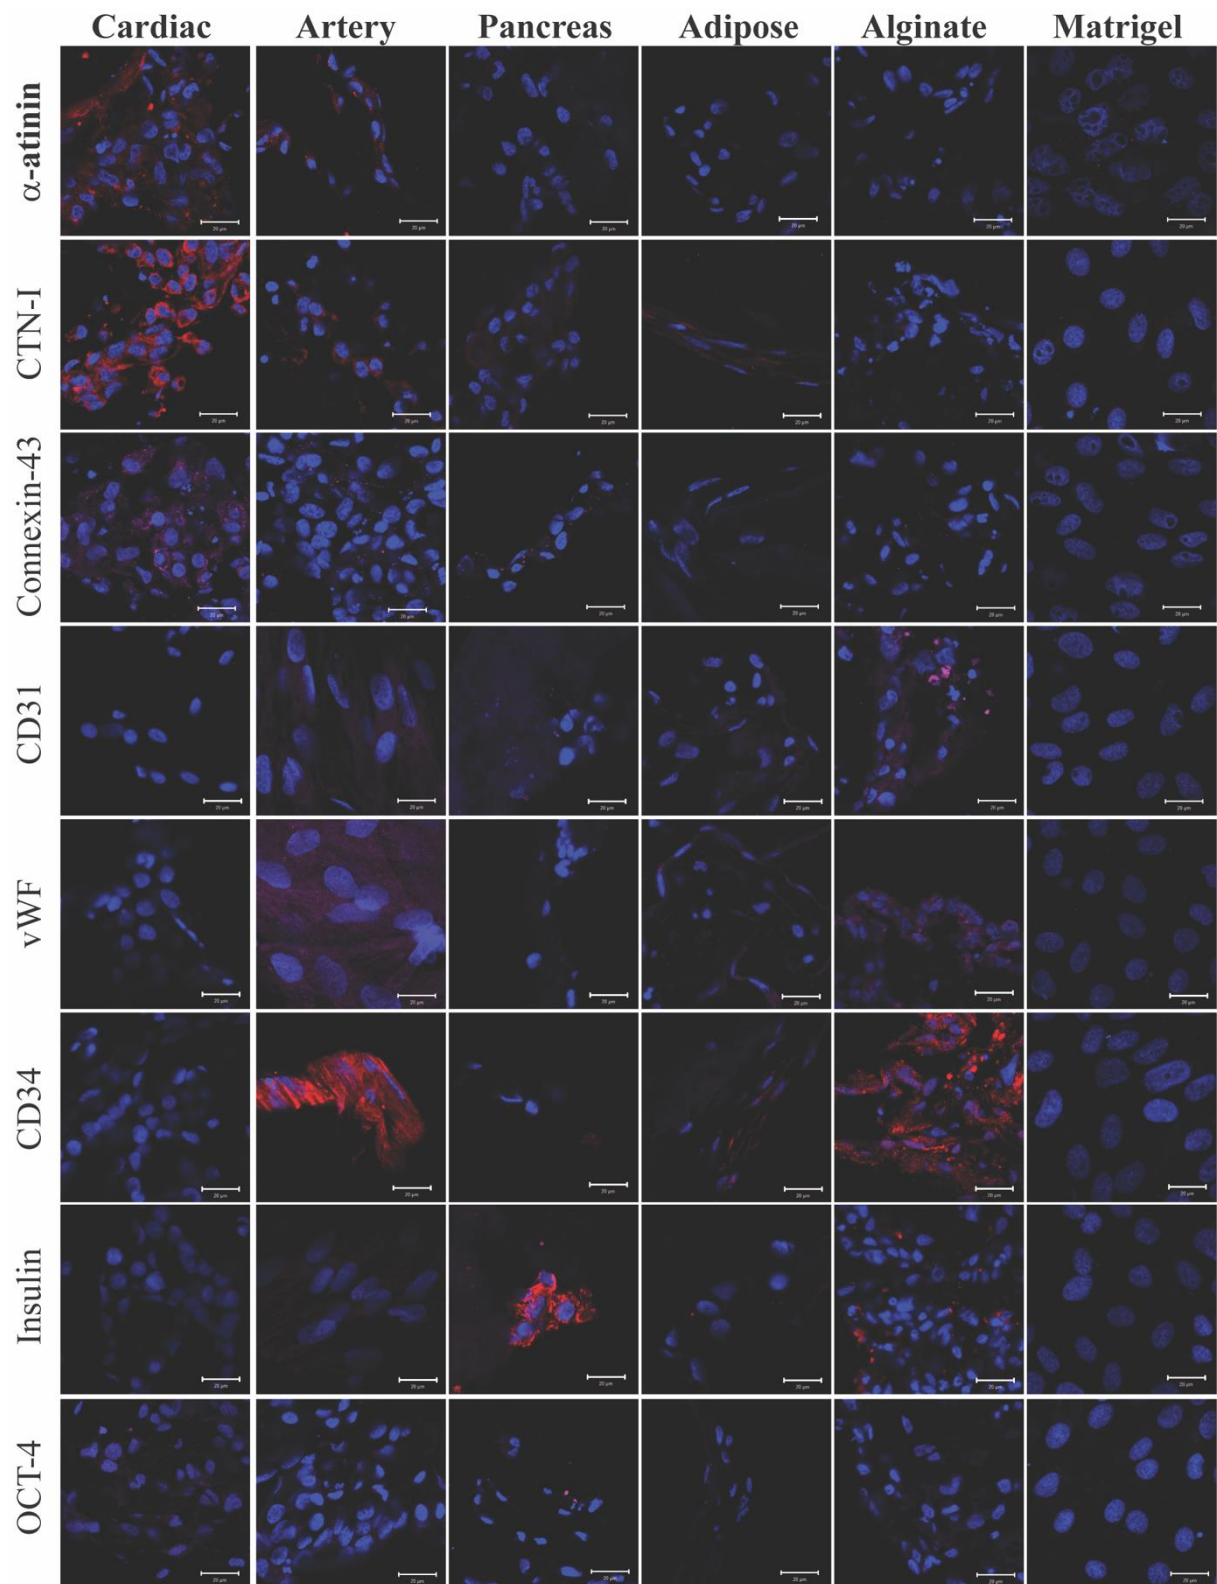

**Figure S4. Spontaneous differentiation of hiPSCs on pECM hydrogels.** Immunostaining of spontaneously differentiated hiPSCs 28 days post-seeding. Red:  $\alpha$ -actinin, cTnI, CD34, and Insulin. Magenta: connexin-43, CD31, vWF and OCT-4. Blue: DAPI (DNA). Scale bars, 20  $\mu$ m.

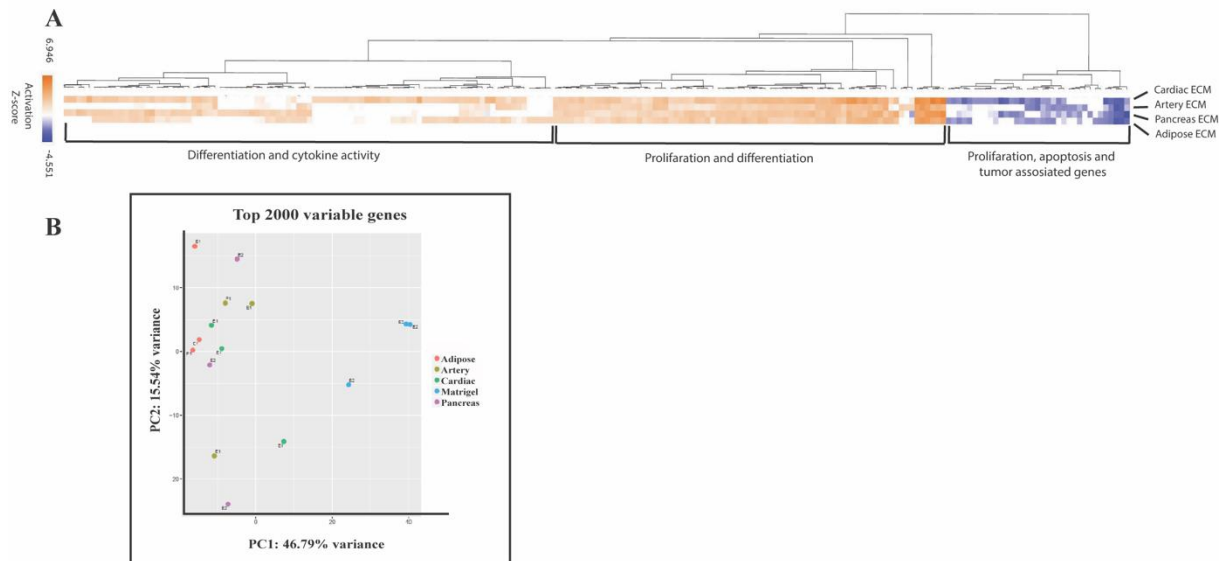

**Figure S5. RNA-seq of spontaneously differentiated hiPSCs on pECM hydrogels.** (A) Hierarchical clustering heat map of gene expression by hiPSCs cultured on the different pECM hydrogels relative to hiPSCs cultured on matrigel. Relative expression (z-score) is displayed in colors, in which orange indicates upregulation and blue indicates downregulation. (B) Principal component analysis (PCA) of the top 2000 variable genes. A comparison between cells cultured on all pECM hydrogels and matrigel.
